# Supplementary material for: The Phenylacetic Acid Catabolic Pathway Regulates Antibiotic and Oxidative Stress Responses in Acinetobacter
Source: PubMed Central journal article supplement (PMC9239106; doi:10.1128/mbio.01863-21), 2022-04-25
Supplement: mbio.01863-21-st002.pdf [file mbio.01863-21-st002.pdf]

**Supplementary Table 2. Differentially regulated chromosomal genes in *ΔpaaB* v. WT in LB**

| <b>Gene</b>   | <b>Annotated function of encoded protein</b>  | <b>Fold Change</b> |
|---------------|-----------------------------------------------|--------------------|
| ACX60_RS03460 | entericidin A/B family lipoprotein            | -2.03              |
| ACX60_RS05035 | hypothetical protein                          | -2.06              |
| ACX60_RS06110 | HemP - heme uptake protein                    | -2.53              |
| ACX60_RS06330 | 30S ribosomal protein S21                     | -2.48              |
| ACX60_RS06605 | hypothetical protein                          | -2.97              |
| ACX60_RS06820 | 3-hydroxyacyl-CoA dehydrogenase               | -2.12              |
| ACX60_RS09200 | GntP - family permease                        | -2.44              |
| ACX60_RS09235 | CoA transferase subunit A                     | -2.81              |
| ACX60_RS09240 | CoA transferase subunit B                     | -3.01              |
| ACX60_RS09245 | short chain fatty acid transporter            | -2.93              |
| ACX60_RS10515 | hypothetical protein                          | -2.72              |
| ACX60_RS10740 | hypothetical protein                          | -2.41              |
| ACX60_RS11185 | stress-induced protein                        | -2.15              |
| ACX60_RS11500 | AbaF - fosfomicin efflux transporter          | -3.23              |
| ACX60_RS11805 | YcsF-family protein                           | -2.19              |
| ACX60_RS12200 | KTSC domain-containing protein                | -2.07              |
| ACX60_RS12960 | hypothetical protein                          | -2.06              |
| ACX60_RS16165 | CrcB- fluoride efflux transporter             | -2.59              |
| ACX60_RS17775 | EpsG family protein                           | -2.08              |
| ACX60_RS17880 | ferredoxin reductase                          | -2.13              |
| ACX60_RS18150 | GlsB/YeaQ/YmgE family stress response protein | -2.14              |
| ACX60_RS19405 | hypothetical protein                          | -2.04              |
| ACX60_RS02105 | RplW - 50S ribosomal protein                  | 2.30               |
| ACX60_RS03825 | AdeK                                          | 2.84               |
| ACX60_RS03830 | AdeJ                                          | 3.59               |
| ACX60_RS03835 | Adel                                          | 2.95               |
| ACX60_RS03840 | phosphatase PAP2 family protein               | 2.88               |
| ACX60_RS11415 | Paal                                          | 2.43               |
| ACX60_RS11420 | PaaY                                          | 2.15               |
| ACX60_RS11425 | PaaX                                          | 3.05               |
| ACX60_RS11430 | PaaK                                          | 2.57               |
| ACX60_RS11435 | PaaJ                                          | 3.05               |
| ACX60_RS11440 | PaaH                                          | 3.67               |
| ACX60_RS11445 | PaaG                                          | 3.28               |
| ACX60_RS11450 | PaaF                                          | 3.28               |
| ACX60_RS11455 | PaaE                                          | 2.41               |
| ACX60_RS11460 | PaaF                                          | 3.29               |
| ACX60_RS11465 | PaaC                                          | 3.12               |
| ACX60_RS11475 | PaaA                                          | 6.13               |
| ACX60_RS11480 | PaaZ                                          | 5.14               |
| ACX60_RS14645 | hypothetical protein                          | 2.20               |
