# Supplementary material for: The Phenylacetic Acid Catabolic Pathway Regulates Antibiotic and Oxidative Stress Responses in Acinetobacter
Source: PubMed Central journal article supplement (PMC9239106; doi:10.1128/mbio.01863-21), 2022-04-25
Supplement: mbio.01863-21-st003.pdf [file mbio.01863-21-st003.pdf]

**Supplementary Table 3. Differentially regulated chromosomal genes in  $\Delta$ paab v. WT in TMP/SMX**

| <b>Gene</b>   | <b>Annotated function of encoded protein</b>        | <b>Fold Change</b> |
|---------------|-----------------------------------------------------|--------------------|
| ACX60_RS00260 | DUF1328 domain-containing protein                   | -2.21              |
| ACX60_RS00325 | HppD - 4-hydroxyphenylpyruvate dioxygenase          | -3.13              |
| ACX60_RS00335 | homogentisate 1,2 dioxygenase                       | -5.69              |
| ACX60_RS00340 | MaiA - maleylacetoacetate isomerase                 | -4.52              |
| ACX60_RS00345 | FahA - fumarylacetoacetase                          | -6.79              |
| ACX60_RS00350 | amino acid permease                                 | -3.05              |
| ACX60_RS00430 | hypothetical protein                                | -2.19              |
| ACX60_RS00695 | ribosome-associated protein                         | -2.08              |
| ACX60_RS01850 | hypothetical protein                                | -2.48              |
| ACX60_RS05490 | hypothetical protein                                | -2.06              |
| ACX60_RS06110 | HemP - hemin uptake protein                         | -2.07              |
| ACX60_RS06425 | YdeI family stress tolerance protein                | -2.01              |
| ACX60_RS06605 | hypothetical protein                                | -2.72              |
| ACX60_RS07415 | hypothetical protein                                | -2.03              |
| ACX60_RS07420 | hypothetical protein                                | -2.12              |
| ACX60_RS09235 | CoA transferase subunit A                           | -2.14              |
| ACX60_RS10070 | HNH endonuclease                                    | -2.01              |
| ACX60_RS10740 | hypothetical protein                                | -2.01              |
| ACX60_RS11185 | stress-induced protein                              | -2.20              |
| ACX60_RS11500 | AbaF - fosfomycin efflux transporter                | -3.17              |
| ACX60_RS12065 | hypothetical protein                                | -2.76              |
| ACX60_RS12910 | gamma-aminobutyraldehyde dehydrogenase              | -2.19              |
| ACX60_RS14780 | acyl-CoA dehydrogenase                              | -2.48              |
| ACX60_RS15630 | glycosyltransferase family 1 protein                | -2.63              |
| ACX60_RS15900 | HdeD family acid-resistance protein                 | -2.12              |
| ACX60_RS16165 | CrcB - fluoride efflux transporter                  | -2.21              |
| ACX60_RS16640 | hypothetical protein                                | -2.35              |
| ACX60_RS16810 | EamA family transporter                             | -2.31              |
| ACX60_RS17680 | DUF4126 domain-containing protein                   | -2.11              |
| ACX60_RS17775 | EpsG family protein                                 | -2.46              |
| ACX60_RS17930 | sulfonate ABC transporter substrate-binding protein | -2.27              |
| ACX60_RS03825 | AdeK                                                | 2.96               |
| ACX60_RS03830 | AdeJ                                                | 3.51               |
| ACX60_RS03835 | Adel                                                | 3.11               |
| ACX60_RS03840 | phosphatase PAP2 family protein                     | 2.85               |
| ACX60_RS05510 | metal dependent hydrolase                           | 2.04               |
| ACX60_RS05950 | septal ring lytic transglycosylase                  | 2.19               |
| ACX60_RS06470 | hypothetical protein                                | 2.04               |
| ACX60_RS06475 | TetR family transcriptional regulator               | 3.52               |
| ACX60_RS06480 | CsuA/B                                              | 4.11               |
| ACX60_RS06485 | CsuA                                                | 4.83               |
| ACX60_RS06490 | CsuB                                                | 6.45               |
| ACX60_RS06495 | CsuC                                                | 4.21               |

|               |                                             |      |
|---------------|---------------------------------------------|------|
| ACX60_RS06500 | CsuD                                        | 3.90 |
| ACX60_RS06505 | CsuE                                        | 2.74 |
| ACX60_RS06640 | Fis - DNA binding transcriptional regulator | 2.03 |
| ACX60_RS07860 | hypothetical protein                        | 2.09 |
| ACX60_RS08350 | phosphopyruvate hydratase                   | 2.00 |
| ACX60_RS09275 | AspA - aspartate ammonina lyase             | 2.28 |
| ACX60_RS10395 | cupin domain-containing protein             | 2.06 |
| ACX60_RS11425 | PaaX                                        | 2.22 |
| ACX60_RS11430 | PaaK                                        | 2.08 |
| ACX60_RS11435 | PaaJ                                        | 2.05 |
| ACX60_RS11440 | PaaH                                        | 2.43 |
| ACX60_RS11445 | PaaG                                        | 2.38 |
| ACX60_RS11450 | PaaF                                        | 2.73 |
| ACX60_RS11455 | PaaE                                        | 2.94 |
| ACX60_RS11460 | PaaD                                        | 3.26 |
| ACX60_RS11465 | PaaC                                        | 3.06 |
| ACX60_RS11475 | PaaA                                        | 3.10 |
| ACX60_RS11480 | PaaZ                                        | 3.55 |
| ACX60_RS12905 | AsnC family transcriptional regulator       | 2.26 |
