# Supplementary material for: The Phenylacetic Acid Catabolic Pathway Regulates Antibiotic and Oxidative Stress Responses in Acinetobacter
Source: PubMed Central journal article supplement (PMC9239106; doi:10.1128/mbio.01863-21), 2022-04-25
Supplement: mbio.01863-21-st005.pdf [file mbio.01863-21-st005.pdf]

**Supplementary Table 5. Oligos used in this study.**

| <b>Name</b>            | <b>Sequence</b>                                                                                                                                  |
|------------------------|--------------------------------------------------------------------------------------------------------------------------------------------------|
| P1                     | AGCGATTGTGTAGGCTGGAGCTG                                                                                                                          |
| P2                     | CATATGAATATCCTCCTTAGTTCCTATTCCG                                                                                                                  |
| UP paaB 5' Fwd         | GTCGATAACACTGTACCGCAAG                                                                                                                           |
| UP paaB-zeo 5' Rev     | GCAGCTCCAGCCTACACAATCGCTCCATAAATCTTGTTAAGCCAC                                                                                                    |
| UP zeo-paaB 3' Fwd     | GAACTAAGGAGGATATTCATATGGGGGAATGGCAAATGAATCATT                                                                                                    |
| UP paaB 3' Rev         | CAACCACTGGCGTACAATCG                                                                                                                             |
| UPAB1 paaB flank F     | GAAGCCATGATGGCTTTGGC                                                                                                                             |
| UPAB1 paaB flank R     | GATTTACAGCAAGCGCG                                                                                                                                |
| 17 paaBKO Fwd          | AATGGGTTCTGTGATGCAGCAGTGGTCTACGCGAAAAACAGCAGCTTGAAGCG<br>AACAAAGTGGCTTAACAAGATTTATGGAAAAATTTGAGGAAATCAAATGGAACA<br>TATGAATATCCTCCTTAGTTCCTATTCCG |
| 17 paaBKO Rev          | ATGCCCGCACCATTGAGCCAAACGCTGAGATAAAACCAGTTGGCTGTCGCCAAT<br>ATGTAATAAGAATTTAGATAAAACTGAATGATTCATTTGCCATTCCCCTTACATAG<br>CGATTGTGTAGGCTGGAGCTGCTTCG |
| 17 paaB flank F        | ATCGTTTGTGCAAAGTCACC                                                                                                                             |
| 17 paaB flank R        | AACTTGGCTTGGAAAGTACCG                                                                                                                            |
| 17paaX 5' Fwd          | GCTCCATATATTCTTGCGTGCC                                                                                                                           |
| 17paaX-frt 5' Rev      | CGAAGCAGCTCCAGCCTACACAATCGCTCATGCCTTGTTATAGTATTGA<br>CGG                                                                                         |
| 17paaX-frt 3' Fwd      | CGGAATAGGAACTAAGGAGGATATTCATATGACTCATGTCTTGCGGTTT<br>AGTTTCAGG                                                                                   |
| 17paaX 3' Rev          | GAAGGCTTACCGATTATTCGTTACCG                                                                                                                       |
| 17 paaX flank F        | CTCTTGCATTGAATTTAAGCAGCGC                                                                                                                        |
| 17 paaX flank R        | CAGGTGAAGTCTGTAAAGATGGCG                                                                                                                         |
| 17 pUCT-paaABC Fwd     | CATGCATGAGCTCACTAGTGGATCCCTCACCTCCTTGTCTTACCAGG                                                                                                  |
| 17 pUCT-paaABC Rev     | GCGAGGTACCGGGCCCAAGCTTGTAAATCTTCGTCAGACGAATGCC                                                                                                   |
| UP pUCT-paa operon Fwd | CATGAGCTCACTAGTGGATCCCTGTGTCAGTTGAGGTTCTTCTAGG                                                                                                   |
| UP pUCT-paa operon Rev | GCGAGGTACCGGGCCCAAGCTTTTAGCGCCCTTTAAAATTTGTTTCACG                                                                                                |
| UPAB1 paaB Rev         | GCCATTCCCCTTACATGTGC                                                                                                                             |
| rpoB FWD set 5         | ACGGTACTGAGCGTGTAAATC                                                                                                                            |
| rpoB REV set 5         | TTACCACTTGAGTGGGTCTTAC                                                                                                                           |
| csuA/B FWD set 1       | GTTGCTGGTTATGCGGTAATA                                                                                                                            |
| csuA/B REV set 1       | TCAGTTTGACTACCACCTACA                                                                                                                            |
| paaA FWD Set 6         | TCTCGCCAAACTCATAGTGG                                                                                                                             |
| paaA REV Set 6         | GTCGATAACACCGTACCTCAA                                                                                                                            |
| paaB FWD set 2         | AGCTTAAGAGCACCTGATGAT                                                                                                                            |
| paaB REV set 2         | CTGAACGAACCACCCAAATG                                                                                                                             |
| mao FWD Set 6          | ACTTATTCCAGGTGGCTCTTC                                                                                                                            |
| mao REV Set 6          | CAGCGGGCATAACGAATAGA                                                                                                                             |
| feaB FWD Set 7         | CAAACCATGCAACCCTCTATTC                                                                                                                           |
| feaB REV Set 7         | ATTCCAAGGCACAATCCCT                                                                                                                              |
